# Supplementary material for: Traffic light type paper-based analytical device for intuitive and semi-quantitative naked-eye signal readout
Source: Royal Society of Chemistry journal article supplement (doi:10.1039/d1lc01060c), 2022-01-01
Supplement: d1lc01060c1.pdf [file d1lc01060c1.pdf]

## Supporting Information for

# Traffic light type paper-based analytical device for intuitive and semi-quantitative naked-eye signal readout

Sera Ohta,<sup>1</sup> Ryuya Hiraoka,<sup>1</sup> Yuki Hiruta<sup>1</sup> and Daniel Citterio<sup>1</sup>

<sup>1</sup>Department of Applied Chemistry, Keio University, 3-14-1 Hiyoshi, Kohoku-ku, Yokohama 223-8522, Japan. Tel: +81 45 566 1568; Fax: +81 45 566 1568

\*To whom correspondence should be addressed. Email: citterio@aplc.keio.ac.jp

## Table of Contents

|                                                                                                                                             |     |
|---------------------------------------------------------------------------------------------------------------------------------------------|-----|
| Scheme S1 Synthesis of boronic acid pinacol ester derivative                                                                                | S3  |
| Fig. S1 Mechanism of chemical valving system                                                                                                | S4  |
| Fig. S2 Simple vertical flow device (Device a-e) for flow-through time measurements                                                         | S5  |
| Fig. S3 Details of traffic light type $\mu$ PADs (Device 1-3)                                                                               | S6  |
| Fig. S4 Fabrication method of traffic light type $\mu$ PAD                                                                                  | S7  |
| Fig. S5 Schematic illustration of traffic light colour display                                                                              | S8  |
| Fig. S6 Device scheme explaining variables used in equations (1) - (3)                                                                      | S9  |
| Fig. S7 Traffic light assay for H <sub>2</sub> O <sub>2</sub> detection using Device 1 and batch-to-batch reproducibility test for Device 2 | S10 |
| Fig. S8 Flow-through time measurements using Device a, b                                                                                    | S11 |
| Fig. S9 Schematic illustration of flow channel modifications for device optimization                                                        | S12 |
| Fig. S10 Absorbance measurements with different pH environment                                                                              | S13 |
| Fig. S11 Flow-through time measurement using Device c-e                                                                                     | S14 |
| Fig. S12 Traffic light assay for H <sub>2</sub> O <sub>2</sub> detection on devices with different pH buffer concentrations                 | S15 |
| Fig. S13 Absorbance measurements with H <sub>2</sub> O <sub>2</sub> /glycerine samples                                                      | S16 |

|                                                                                                             |     |
|-------------------------------------------------------------------------------------------------------------|-----|
| Fig. S14 Traffic light assay for glucose detection using Device 2a, 2b                                      | S17 |
| Fig. S15 Comparison of stability of colorimetric signals in glucose assays                                  | S18 |
| Fig. S16 Traffic light assay for glucose detection using Device 3 with different sample application methods | S19 |
| Table S1 Composition of artificial urine matrix                                                             | S20 |

**Scheme S1 : Synthesis of boronic acid pinacol ester derivative**

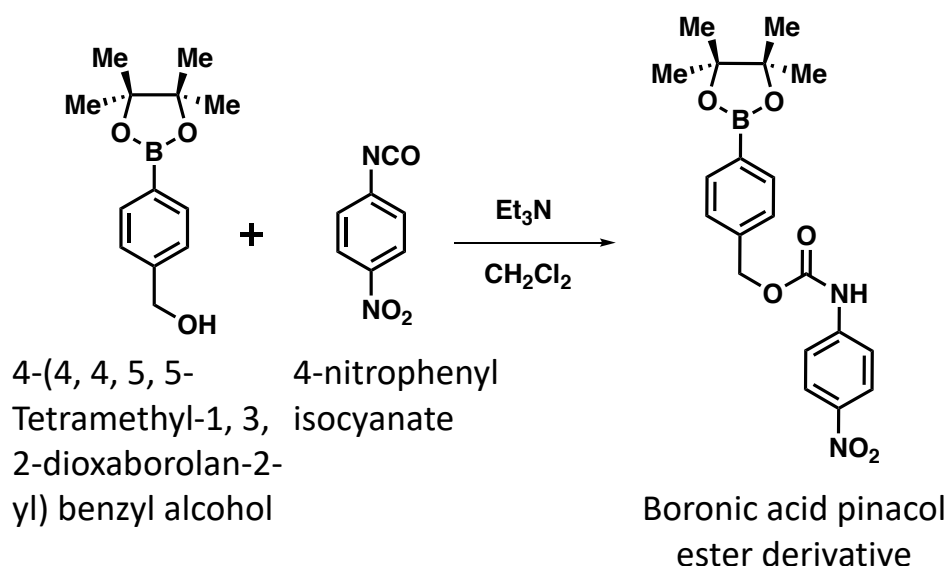

4-(4, 4, 5, 5-Tetramethyl-1, 3, 2-dioxaborolan-2-yl) benzyl alcohol (5.40 g, 23.0 mmol, 1.0 eq) was dissolved in triethylamine (3.3 mL, 23.8 mmol, 1.0 eq) under an Ar atmosphere at 0°C. 4-Nitrophenyl isocyanate (4.20 g, 25.6 mmol, 1.1 eq) dissolved in dichloromethane (230 mL) was dripped into the solution over 20 min with stirring under Ar at 0°C. Stirring was continued for 3 h at room temperature and the solvents removed by a rotary evaporator. The crude compound was purified by flash column chromatography (elution with Toluene-EtOAc 95:5) affording the boronic acid pinacol ester derivative as a white solid in 67% yield (6.15 g, 15.4 mmol).

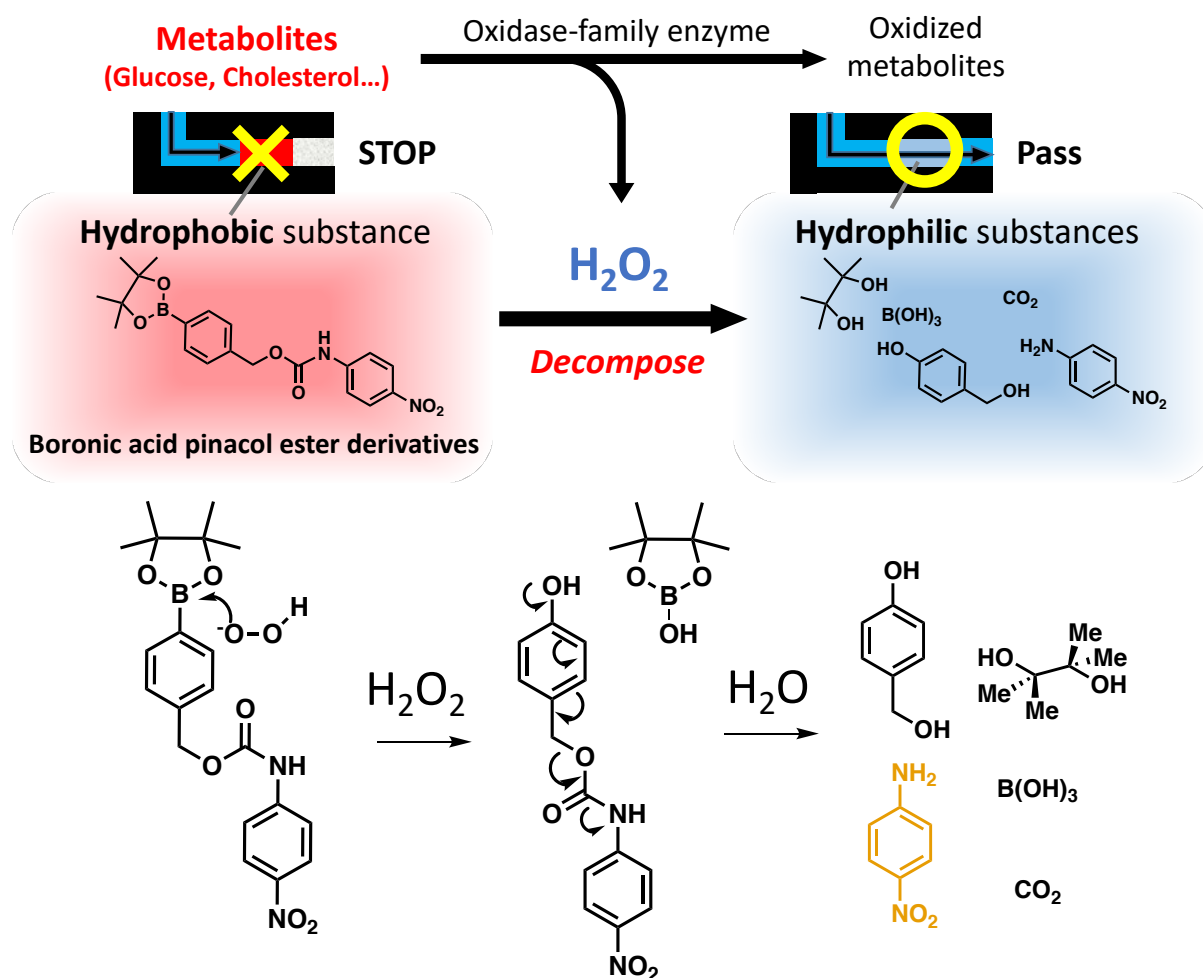

**Fig. S1 :** (a) Chemical valving system using a boronic acid pinacol ester derivative as phase-switching substance: the hydrophobic state stops the sample flow, while the hydrophilic state induced by decomposition following reaction with  $H_2O_2$  allows the sample to flow through; (b) Mechanism of chemical decomposition of boronic acid pinacol ester derivative by reaction with  $H_2O_2$ , producing the yellow p-nitroaniline compound.

## (a) Device design

### (1) Microcapillary (Device a)

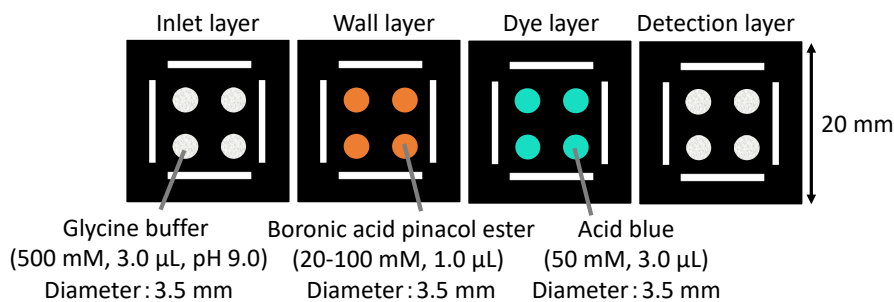

Top view

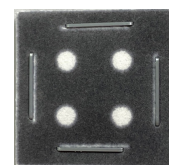

Back view

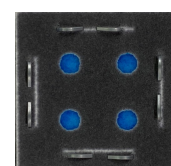

### (2) Dispenser (Device b-e)

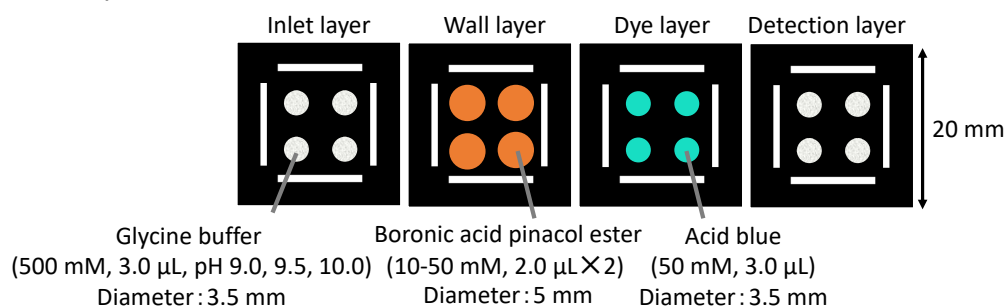

## (b) Deposited reagents

| Device name | Switching reagent application | Inlet layer(1)                                  | Wall layer(2)                                      | Dye layer(3)                 | Detection layer(4) | Applied sample                                     |
|-------------|-------------------------------|-------------------------------------------------|----------------------------------------------------|------------------------------|--------------------|----------------------------------------------------|
| a           | Microcapillary                | Glycine buffer<br>(500 mM, 3.0 μL, pH 9.0)      | Boronic acid pinacol ester<br>(20-100 mM, 1.0 μL)  | Acid blue<br>(50 mM, 3.0 μL) |                    | H <sub>2</sub> O <sub>2</sub><br>(0-100 mM, 10 μL) |
| b           | Dispenser                     |                                                 | Boronic acid pinacol ester<br>(10-50 mM, 2.0 μLX2) |                              |                    |                                                    |
| c           |                               | Boronic acid pinacol ester<br>(50 mM, 2.0 μLX2) |                                                    |                              |                    |                                                    |
| d           |                               |                                                 |                                                    |                              |                    |                                                    |
| e           |                               |                                                 |                                                    |                              |                    |                                                    |
|             |                               | Glycine buffer<br>(500 mM, 3.0 μL, pH 9.0)      |                                                    |                              |                    | H <sub>2</sub> O <sub>2</sub><br>(0-50 mM, 10 μL)  |
|             |                               | Glycine buffer<br>(500 mM, 3.0 μL, pH 9.5)      |                                                    |                              |                    |                                                    |
|             |                               | Glycine buffer<br>(500 mM, 3.0 μL, pH 10.0)     |                                                    |                              |                    |                                                    |

## (c) Device fabrication method

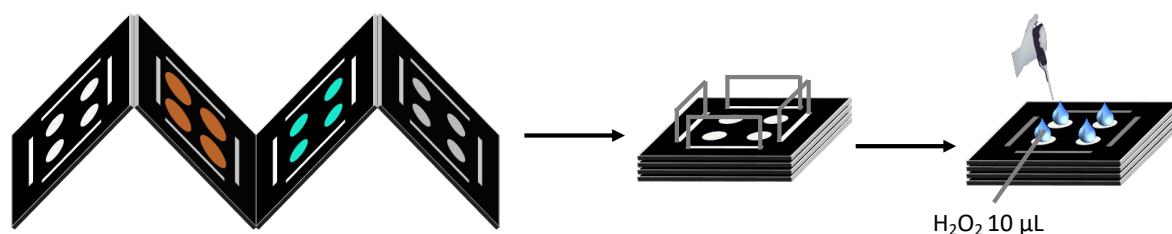

**Fig. S2** : (a) Design of simple vertical flow origami-type paper device for flow-through time measurement. The indicated scales represent the pre-set values in the Adobe Illustrator CC software used for wax printing. Photograph of top and backside view of the device after color appearance. (b) Details about amounts and types of reagents applied to each layer and the application method of the boronic acid pinacol ester solution on the “wall layer” for Devices a-e. (c) Device fabrication and experimental method for flow-through time measurement.

### (a) Design of **Device 1**

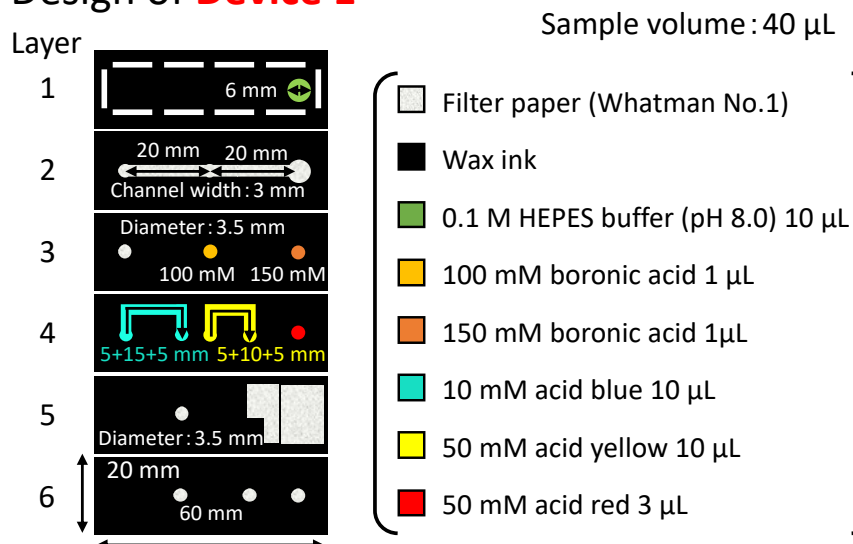

### (b) Design of **Device 2**

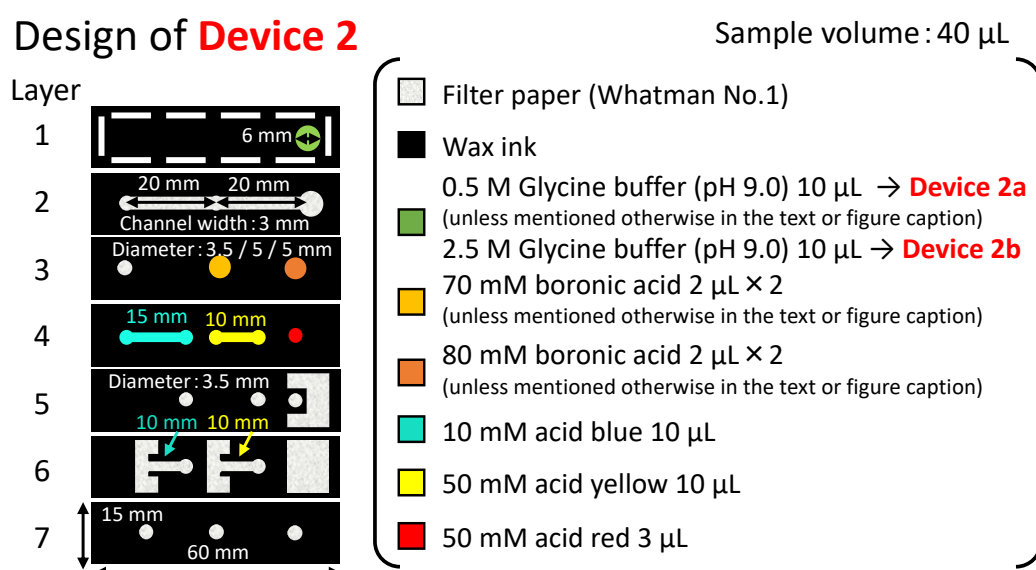

### (c) Design of **Device 3**

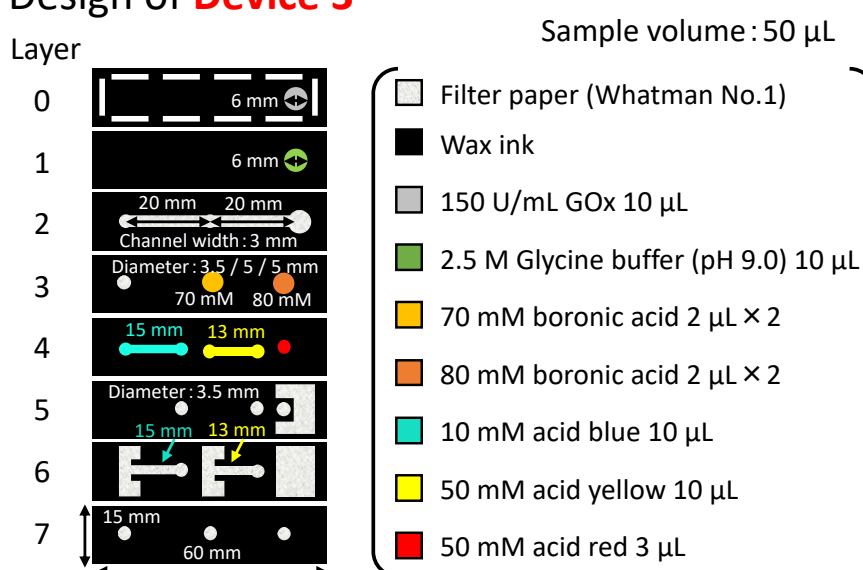

**Fig. S3** : Design details of various traffic light type  $\mu$ PADs: (a) Device 1, (b) Devices 2a, 2b, (c) Device 3. The indicated scales represent the pre-set values in the Adobe Illustrator CC software.

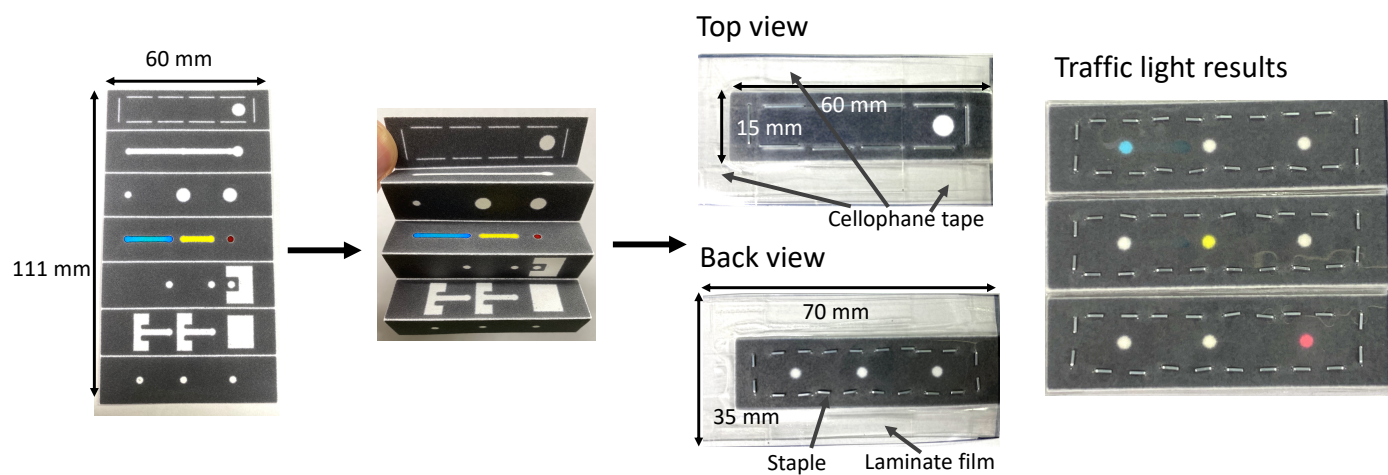

**Fig. S4** : Traffic light type  $\mu$ PAD assembly method (shown on the example of Device 2) and photographs of device backsides showing the traffic light signal (green, yellow or red) after the application of samples of various  $H_2O_2$  concentrations.

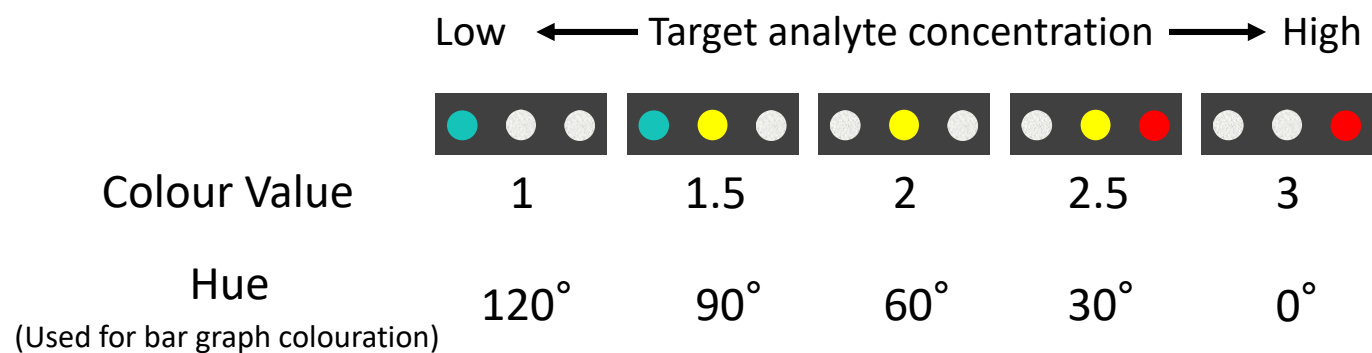

**Fig. S5** : Schematic illustration of the colour evaluation method to convert the traffic light colours into color values. The hue is used to support the visualization of quantitative results at a certain analyte concentration.

(a) Six-layer device  
(Device 1)

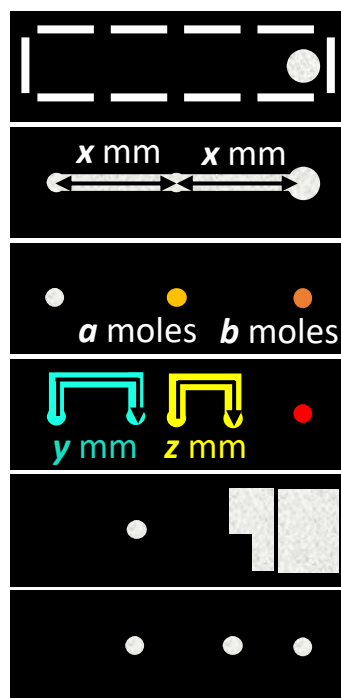

(b) Seven-layer device  
(Device 2)

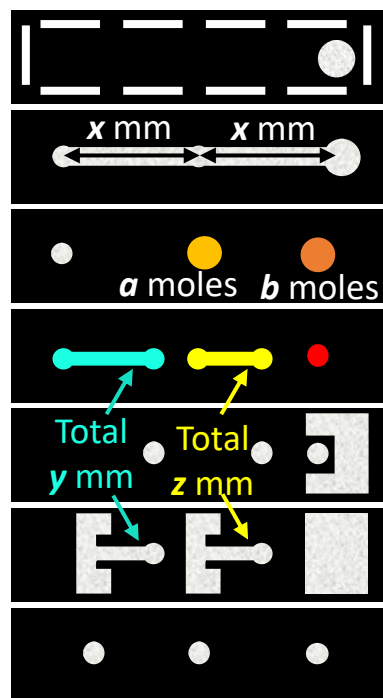

**Fig. S6** : Devices of Fig. S3 with indication of variables used in equations (1) - (3) of the main text: (a) six-layer (Device 1) and (b) seven-layer (Device 2) traffic light type  $\mu$ PAD.

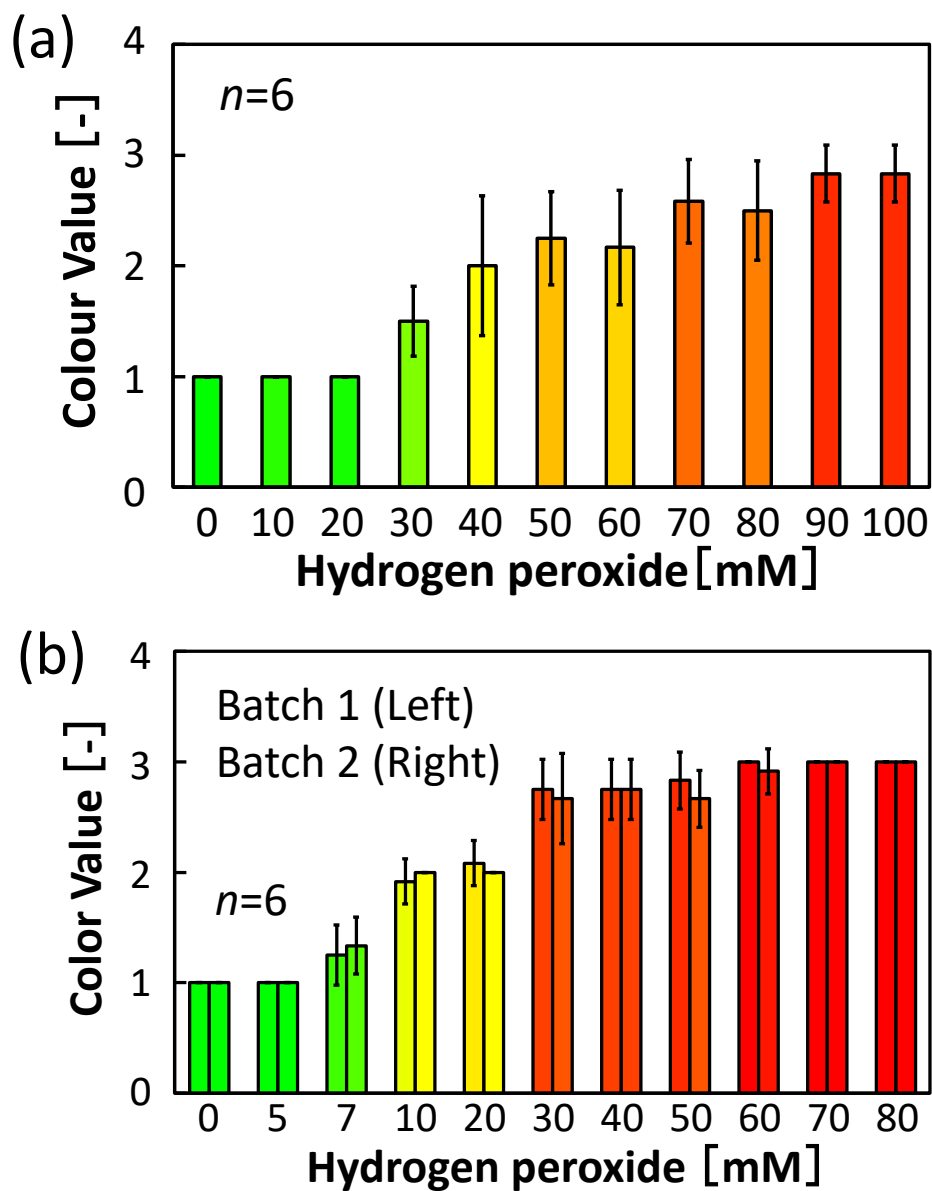

**Fig. S7** : Results of traffic light assay for  $\text{H}_2\text{O}_2$  detection using (a) Device 1, and (b) Device 2a demonstrating the reproducibility between two batches of devices independently fabricated within approximately 8 months. Error bars represent mean values  $\pm 1 \sigma$  for 6 individually fabricated  $\mu$ PADs.

(a) Microcapillary (Device a in Fig. S2)

| Flow-through time [s]                              |     | Hydrogen peroxide [mM] |               |               |               |              |              |
|----------------------------------------------------|-----|------------------------|---------------|---------------|---------------|--------------|--------------|
|                                                    |     | 0                      | 20            | 40            | 60            | 80           | 100          |
| Boronic acid<br>pinacol ester<br>[mM]<br>1 $\mu$ L | 20  | 3 $\pm$ 1              | 4 $\pm$ 1     | 2 $\pm$ 0     | 3 $\pm$ 1     | 3 $\pm$ 1    | 2 $\pm$ 1    |
|                                                    | 40  | 14 $\pm$ 10            | 7 $\pm$ 4     | 38 $\pm$ 60   | 6 $\pm$ 3     | 6 $\pm$ 2    | 6 $\pm$ 1    |
|                                                    | 60  | 493 $\pm$ 872          | 94 $\pm$ 153  | 72 $\pm$ 68   | 33 $\pm$ 27   | 85 $\pm$ 67  | 62 $\pm$ 75  |
|                                                    | 80  | 978 $\pm$ 952          | 233 $\pm$ 215 | 259 $\pm$ 150 | 168 $\pm$ 133 | 83 $\pm$ 76  | 131 $\pm$ 76 |
|                                                    | 100 | 1402 $\pm$ 797         | 581 $\pm$ 98  | 249 $\pm$ 107 | 300 $\pm$ 37  | 192 $\pm$ 91 | 206 $\pm$ 88 |

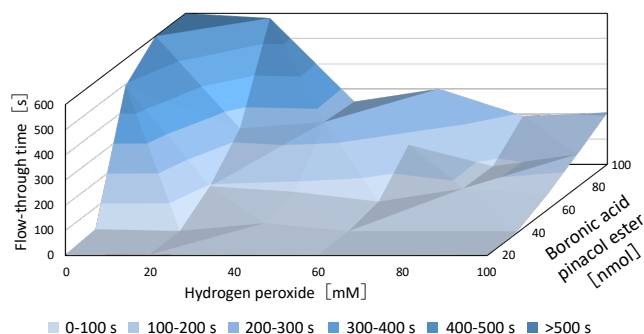

(b) Dispenser (Device b in Fig. S2)

| Flow-through time [s]                                       |    | Hydrogen peroxide [mM] |              |              |             |             |             |
|-------------------------------------------------------------|----|------------------------|--------------|--------------|-------------|-------------|-------------|
|                                                             |    | 0                      | 20           | 40           | 60          | 80          | 100         |
| Boronic acid<br>pinacol ester<br>[mM]<br>2 $\mu$ LX 2 times | 10 | 17 $\pm$ 10            | 7 $\pm$ 2    | 5 $\pm$ 1    | 5 $\pm$ 1   | 5 $\pm$ 1   | 4 $\pm$ 1   |
|                                                             | 20 | 287 $\pm$ 132          | 23 $\pm$ 9   | 18 $\pm$ 3   | 20 $\pm$ 7  | 15 $\pm$ 1  | 13 $\pm$ 2  |
|                                                             | 30 | 692 $\pm$ 154          | 89 $\pm$ 22  | 42 $\pm$ 14  | 30 $\pm$ 5  | 32 $\pm$ 2  | 33 $\pm$ 3  |
|                                                             | 40 | 1656 $\pm$ 145         | 128 $\pm$ 14 | 92 $\pm$ 10  | 70 $\pm$ 6  | 63 $\pm$ 8  | 57 $\pm$ 6  |
|                                                             | 50 | >1800                  | 202 $\pm$ 11 | 113 $\pm$ 14 | 103 $\pm$ 4 | 86 $\pm$ 18 | 81 $\pm$ 14 |

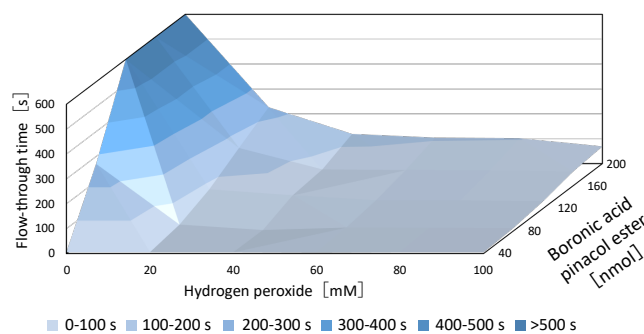

**Fig. S8** : Measurement of  $\text{H}_2\text{O}_2$  concentration-dependent flow-through times for model devices a and b (Fig. S2) to evaluate the fabrication reproducibility of hydrophobic walls. Fixed volumes of boronic acid pinacol ester derivative solutions of varying concentrations were deposited onto paper spots using (a) a microcapillary to apply the reagent solutions to the top surface of the wall layer (1  $\mu\text{L}/\text{spot}$ ), or (b) a dispenser to apply the reagent solutions to the top (2  $\mu\text{L}/\text{spot}$ ) and bottom surfaces (2  $\mu\text{L}/\text{spot}$ ) of the wall layer. The tables show the flow-through times from  $\text{H}_2\text{O}_2$  sample application to colour appearance measured for Device a (microcapillary) and Device b (dispenser) ( $n = 4$ ; mean value  $\pm 1\sigma$ ). Colours of table cells indicate the order of the flow-through time and are represented in a gradient using six levels of blue. The 3D-plots provide a more visual representation of the data shown in the tables.

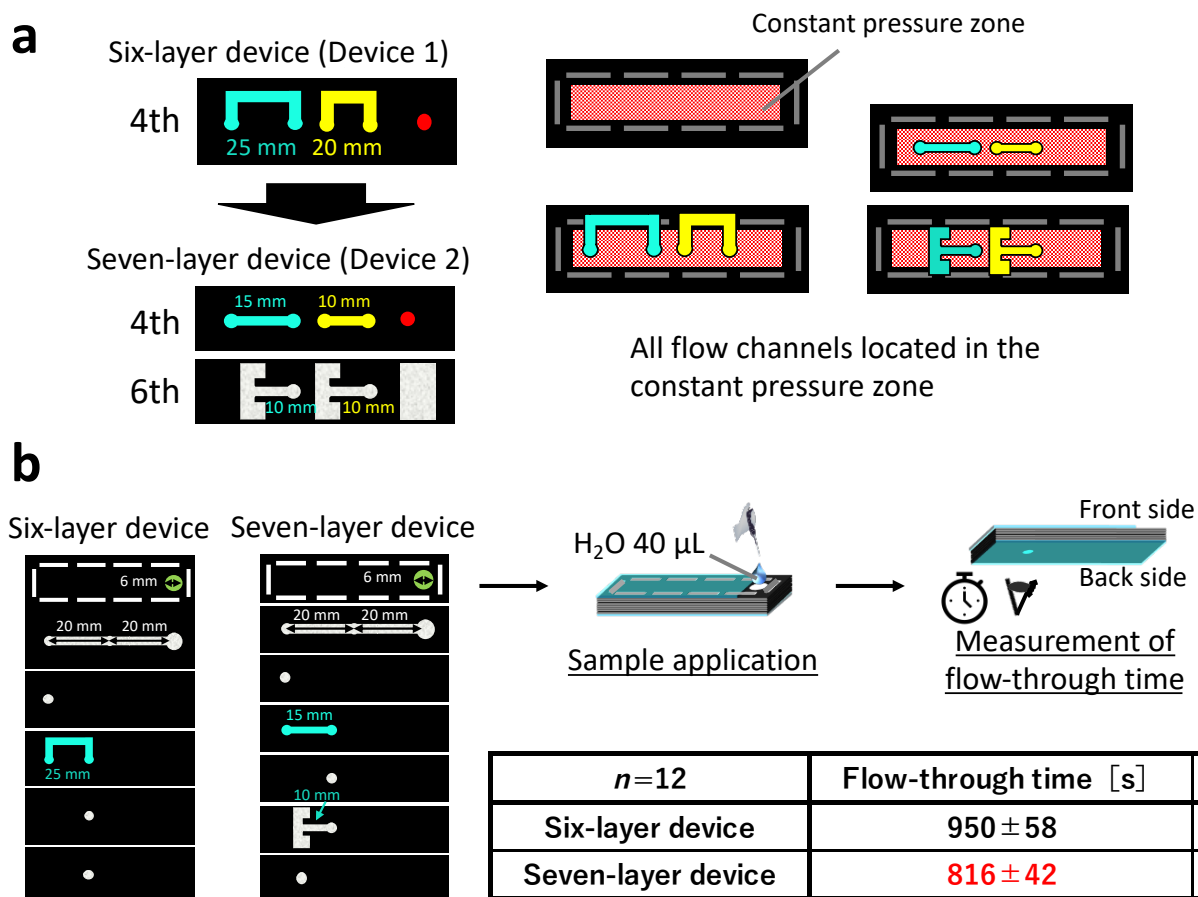

**Fig. S9** : Schematic illustration of flow channel modifications for device optimization: (a) Splitting of flow channels to arrange them in a zone of constant pressure (marked in red) between folded paper layers surrounded by staples; (b) outline of six- and seven-layer model devices (no hydrophobic walls; only green channel) used to measure the overall liquid flow-through times (mean  $\pm 1\sigma$  for  $n = 12$ ).

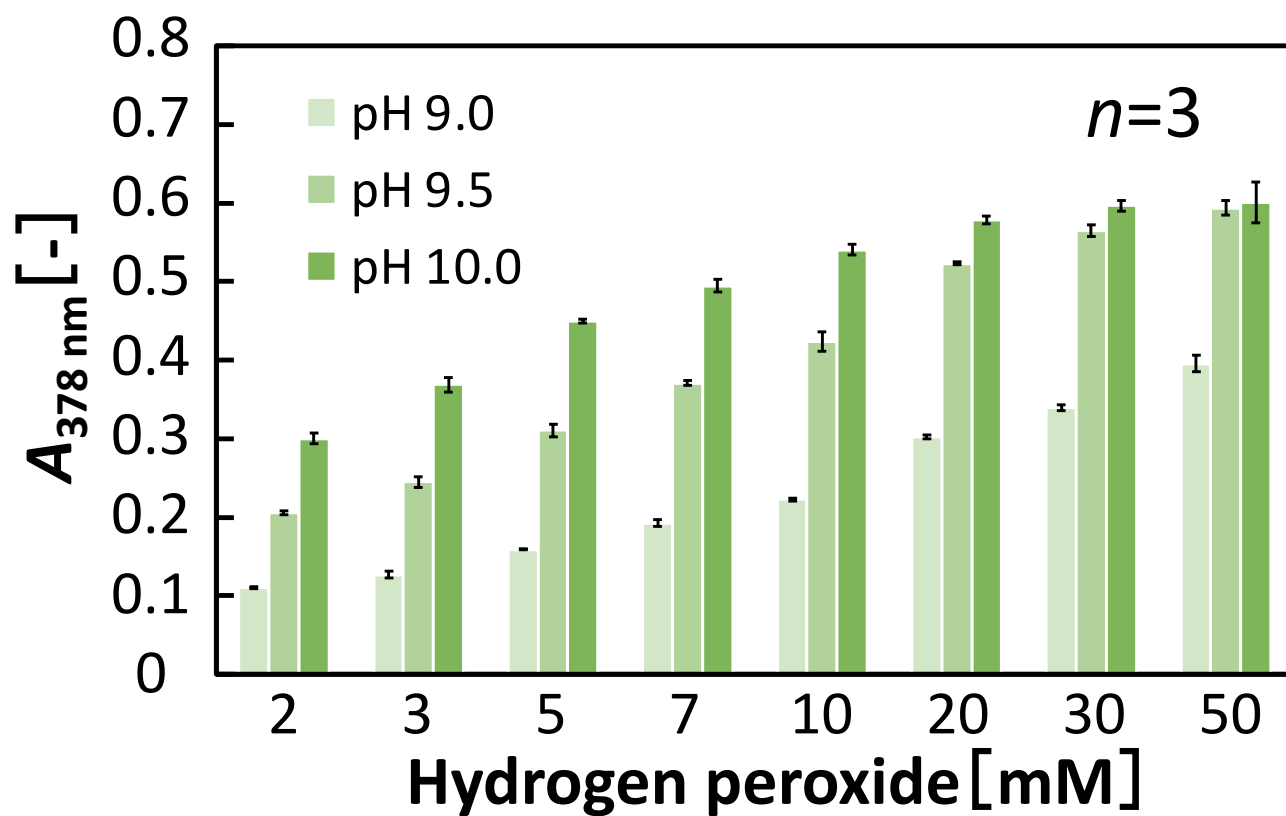

**Fig. S10** : Absorbance measurements after exposing paper disks modified with boronic acid pinacol ester for 10 min to solutions of various  $\text{H}_2\text{O}_2$  concentrations and different pH in glycine buffer (pH 9.0, 9.5, 10.0); error bars represent mean values  $\pm 1\sigma$  ( $n=3$ ).

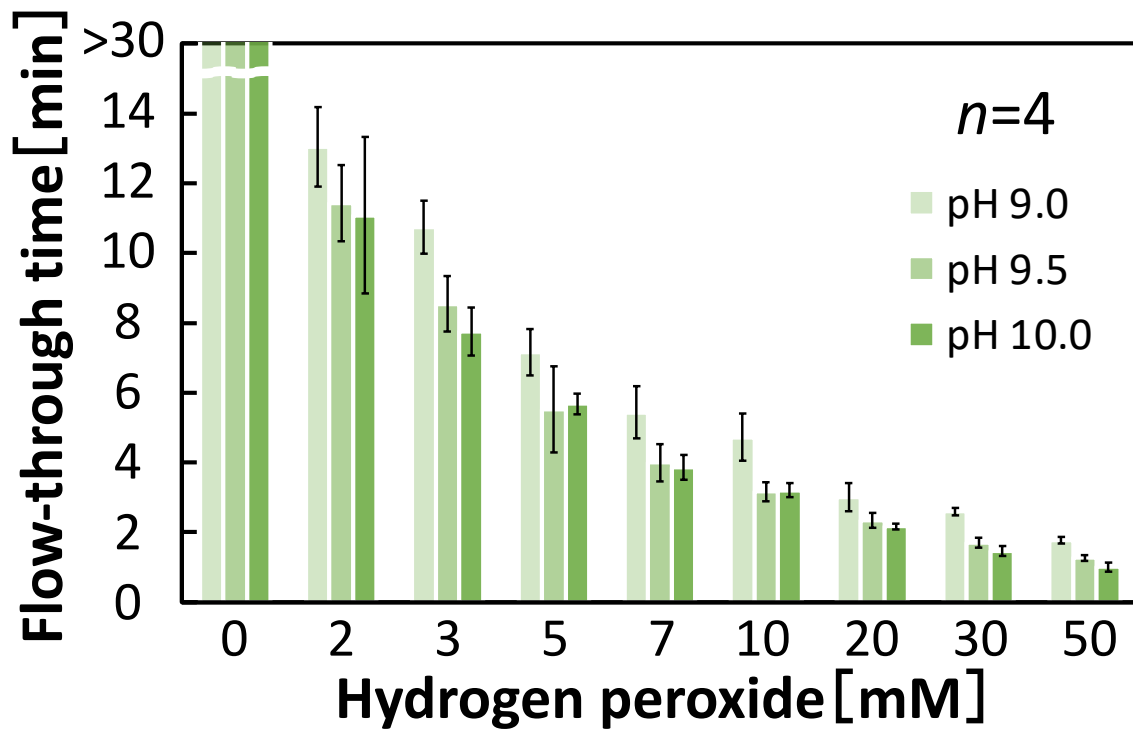

**Fig. S11** : Measurement of  $\text{H}_2\text{O}_2$  concentration-dependent flow-through times at different pH values (pH 9.0, 9.5, 10.0) using model Devices c-e (Fig. S2); error bars represent mean values  $\pm 1\sigma$  ( $n = 4$ ).

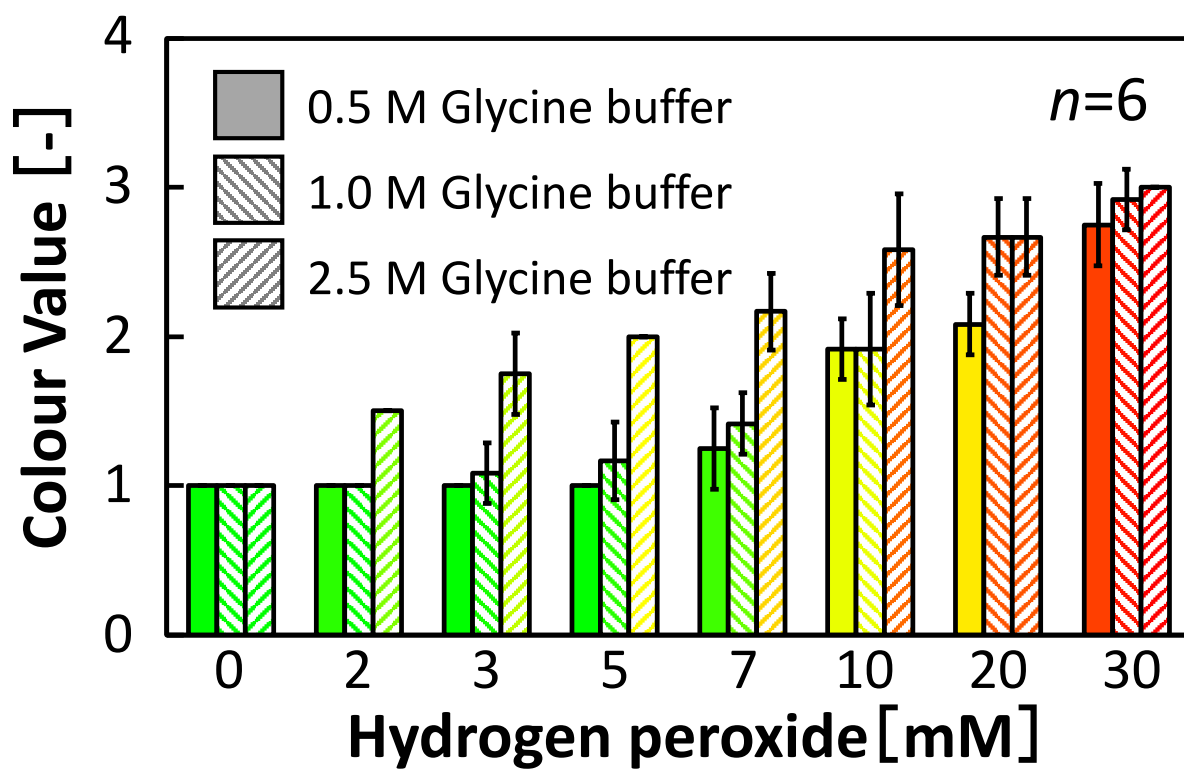

**Fig. S12** : Results of traffic light assay for  $H_2O_2$  detection demonstrating changes of the concentration threshold for displaying traffic light colours by increasing the concentration of the glycine buffer (pH 9.0) pre-deposited on the device (Device 2); error bars represent mean values  $\pm 1\sigma$  ( $n=6$ ).

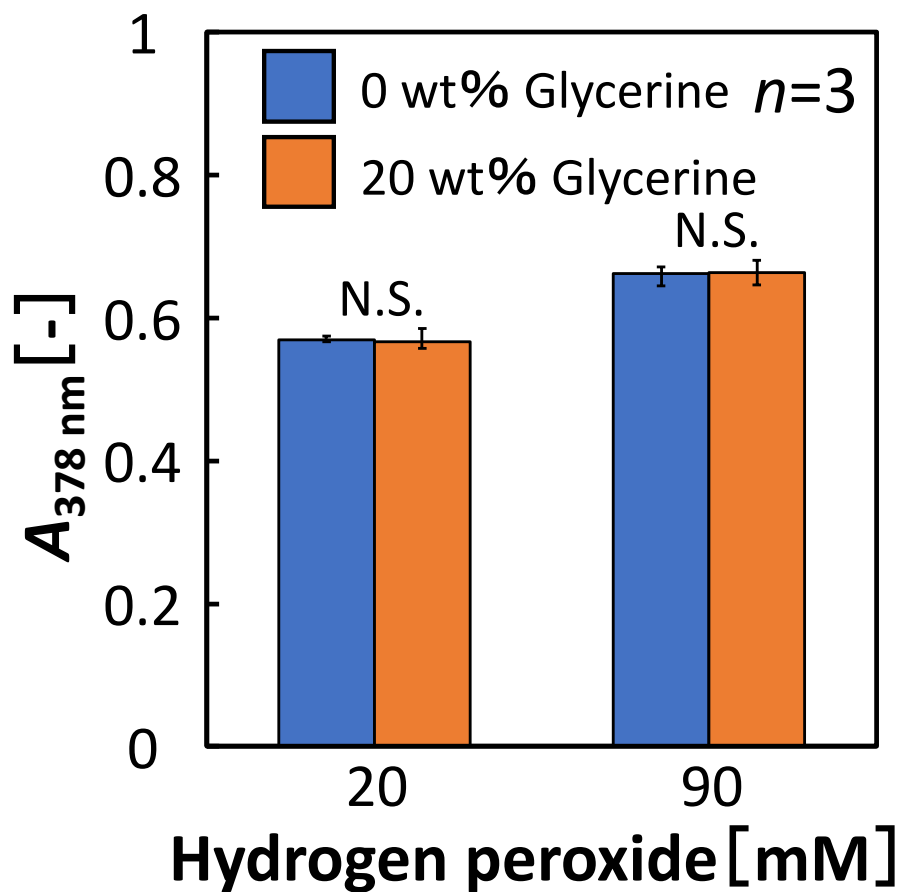

**Fig. S13** : Absorbance measurements after exposing paper disks modified with boronic acid pinacol ester for 20 min to solutions of  $\text{H}_2\text{O}_2$  in glycine buffer (pH 9.0) containing glycerine; error bars represent mean values  $\pm 1\sigma$  ( $n=3$ ); N.S.: not significant.

(a) Glucose detection with Device 2a

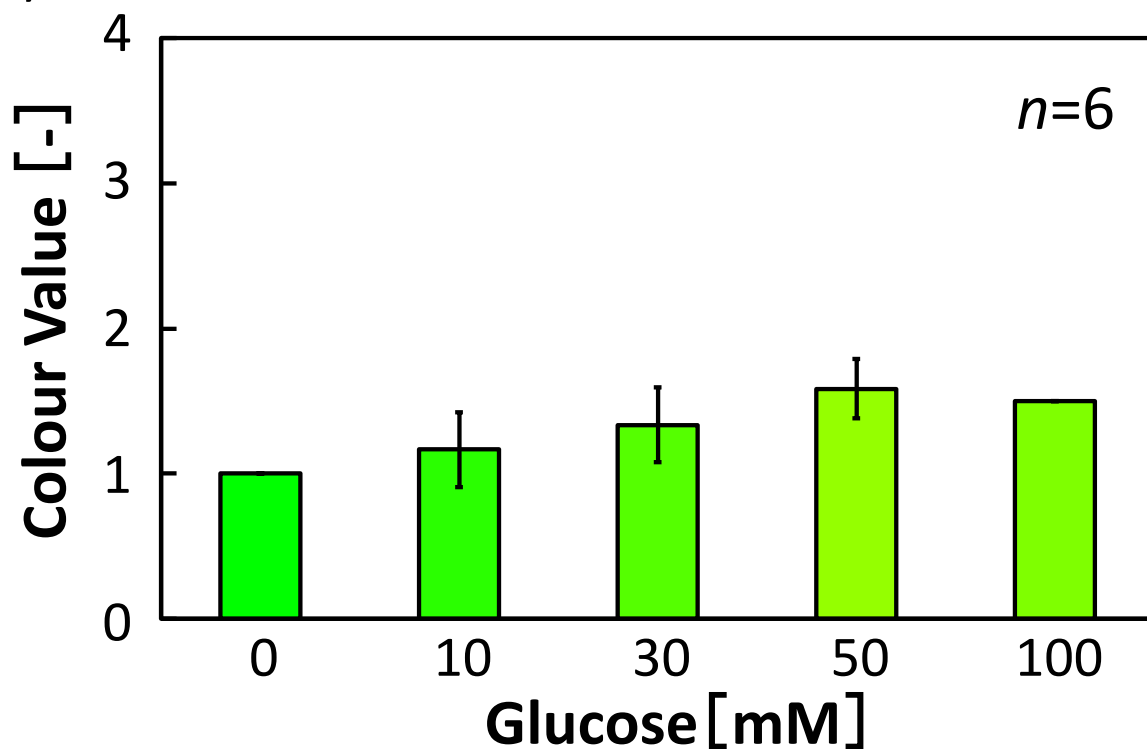

(b) Glucose detection with Device 2b

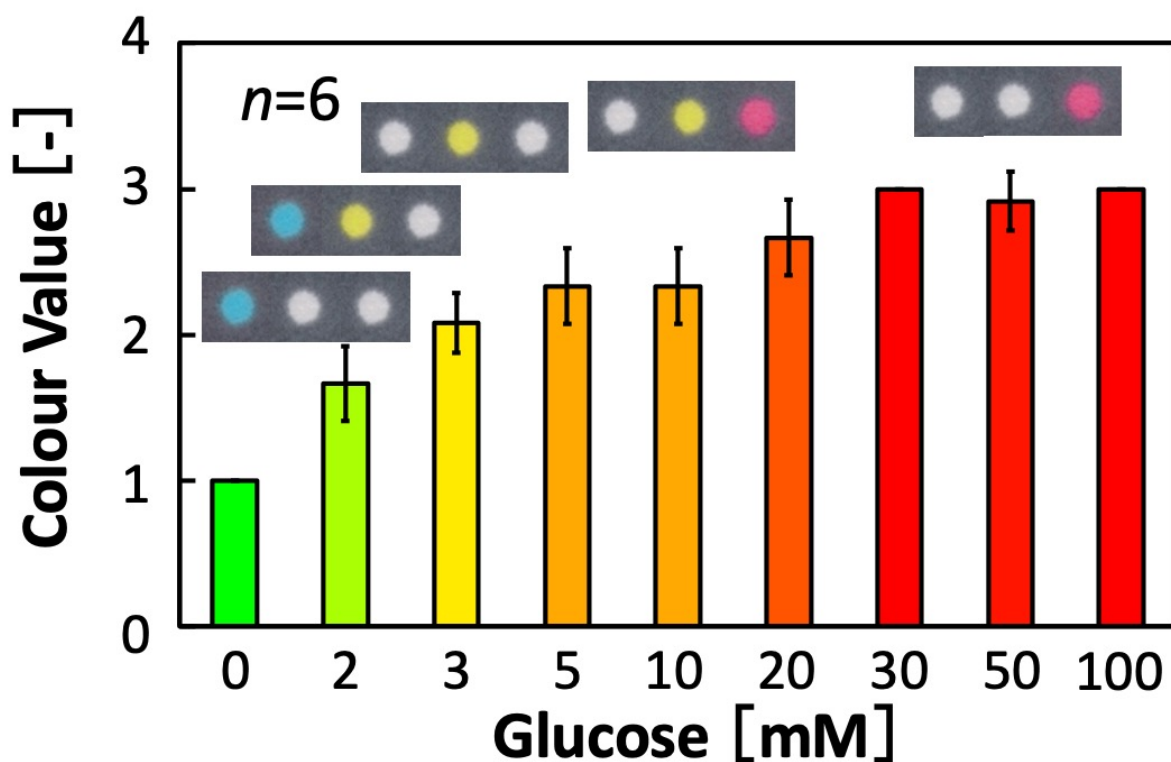

**Fig. S14** : Results of traffic light colour glucose assay from aqueous samples reacted with GOx off-device: (a) Device 2a and (b) Device 2b; error bars represent mean values  $\pm 1\sigma$  ( $n = 6$ ); insets show the actually observed traffic light signal for each respective analyte concentration (note: images of colored spots are cut and pasted next to each other in magnified form; refer to Fig. S4 for an example of an actual size image).

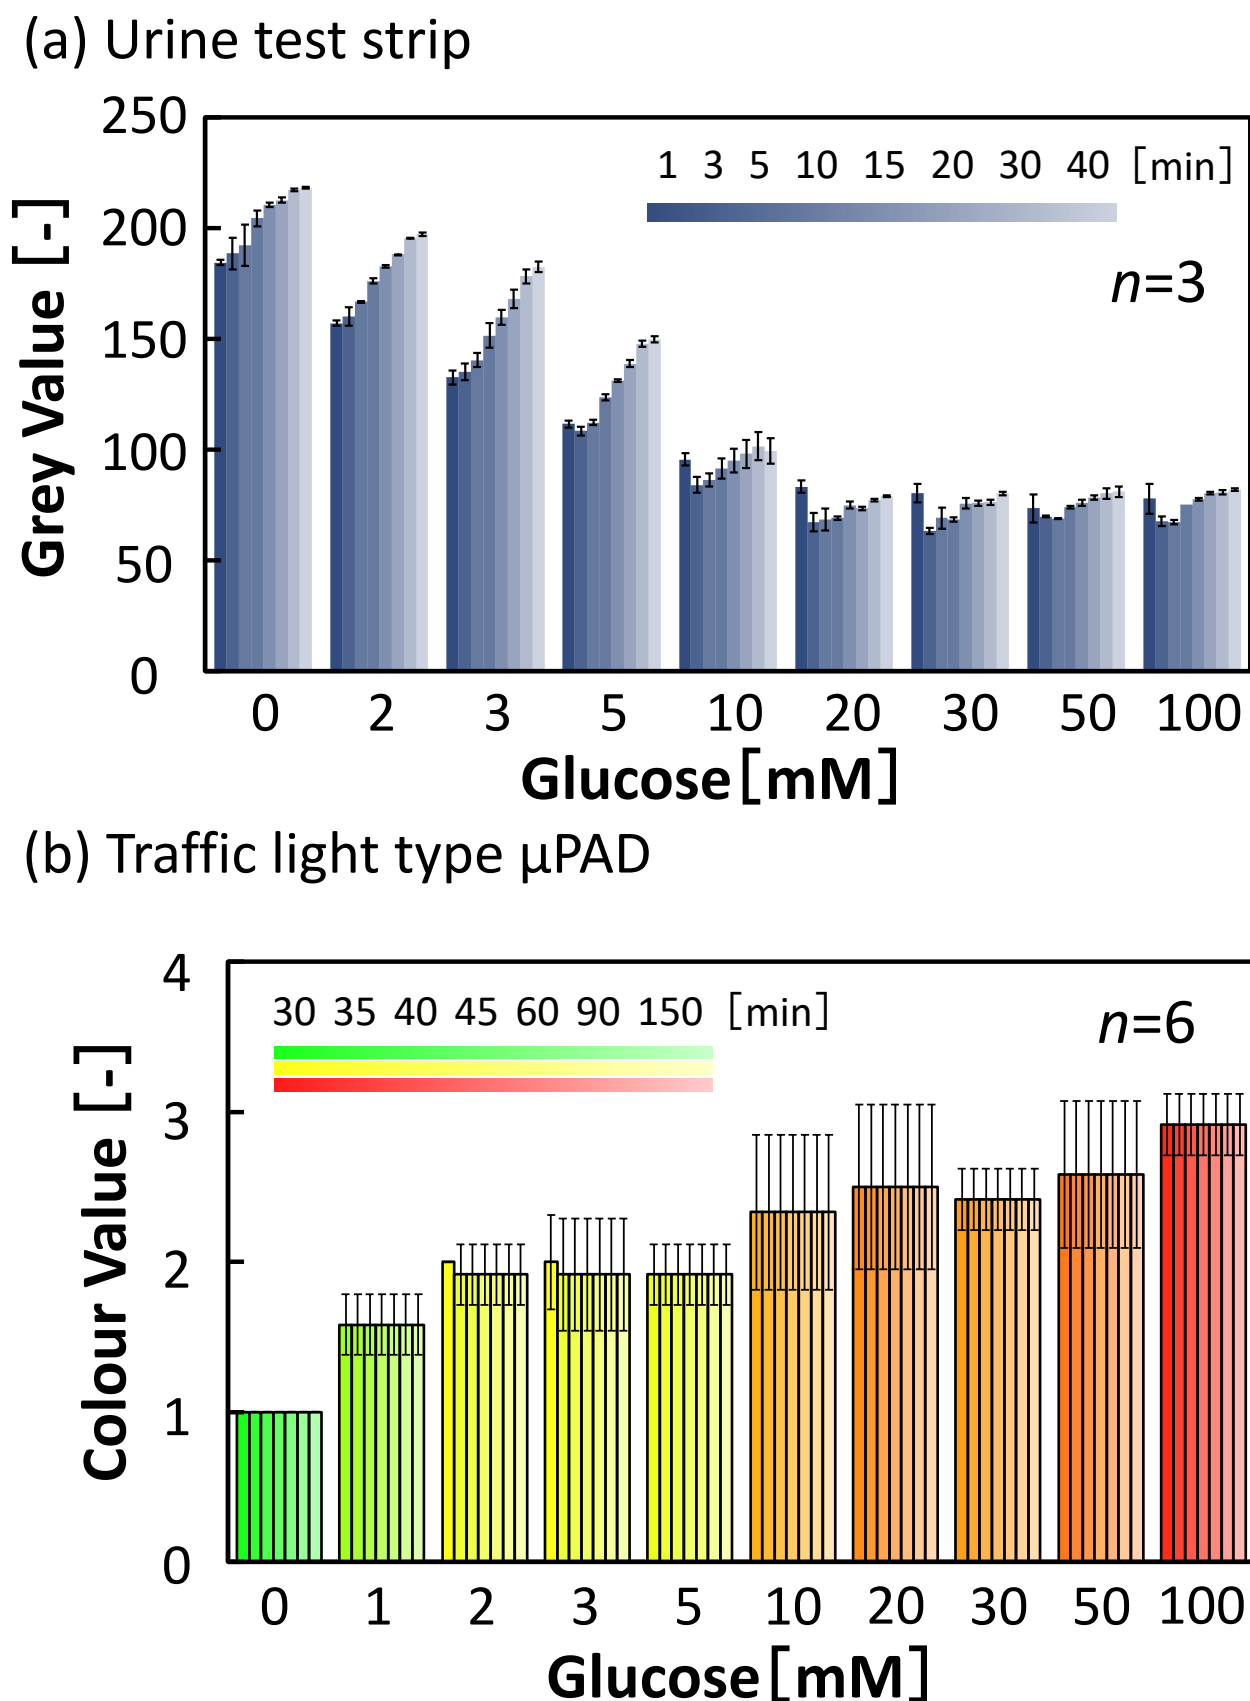

**Fig. S15** : Comparison of time stability of colorimetric signals in glucose assays: (a) grey value of the glucose test zone of a urine test strip at various times from sample application (note: manufacturer indicates that colour must be read out at 1 min); error bars represent the mean values  $\pm 1\sigma$  ( $n = 3$ ); (b) traffic light colours displayed at various times from sample application; error bars represent the mean values  $\pm 1\sigma$  ( $n = 6$ ).

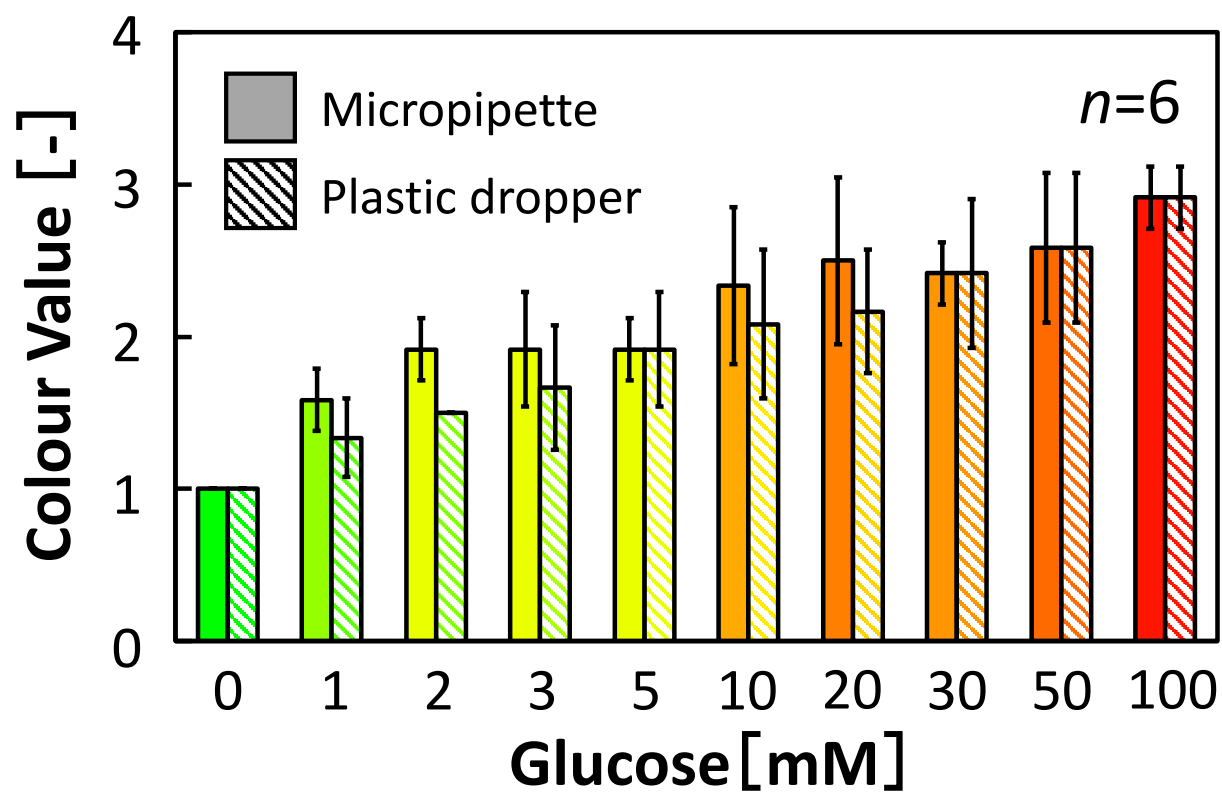

**Fig. S16** : Results of traffic light assay for glucose detection using Device 3 in combination with different sample application methods (micropipette or simple plastic dropper); error bars represent the mean values  $\pm 1\sigma$  ( $n = 6$ ).

**Table S1** : Composition of artificial urine matrix.

| <b>Component</b>                | <b>Concentration [mM]</b> |
|---------------------------------|---------------------------|
| L-Lactic acid                   | 1.1                       |
| Citric acid                     | 2                         |
| Sodium bicarbonate              | 25                        |
| Urea                            | 170                       |
| Calcium chloride                | 2.5                       |
| Sodium chloride                 | 90                        |
| Magnesium sulphate              | 2                         |
| Sodium sulphate                 | 10                        |
| Potassium dihydrogen phosphate  | 7                         |
| Di-potassium hydrogen phosphate | 7                         |
| Ammonium chloride               | 25                        |
